# Supplementary material for: Chemical Influence of Scutellaria baicalensis—Coptis chinensis Pair on the Extraction Efficiencies of Flavonoids and Alkaloids at Different Extraction Times and Temperatures
Source: MDPI journal article supplement (doi:10.3390/separations10020131), 2023-02-15
Supplement: s1 [file s1]

Archive with 1 entries (1 files):
- separations-2217652-supplementary.pdf
